# Supplementary material for: Fast Rate Production of Biodiesel from Neem Seed Oil Using a Catalyst Made from Banana Peel Ash Loaded with Metal Oxide (Li‐CaO/Fe2 (SO4)3)
Source: Hindawi journal article supplement (doi:10.1155/2020/7825024), 2020-01-01
Supplement: f1 [file 7825024.f1.docx]

Fast rate production of biodiesel from neem seed oil using a catalyst made from banana peel ash loaded with metal oxide (Li-CaO/Fe2 (SO4)3)

Ismail J. Madai 1, 2, 3 Yusufu Abeid Chande Jande 1, 3,*Thomas Kivevele 1, 3

1Department of Materials and Energy Science and Engineering, the Nelson Mandela African Institution of Science and Technology, P. O. Box 447, Arusha, Tanzania

2 Department of School Quality Assurance Ministry of Education, Science and Technology

Dodoma Tanzania

3Water Infrastructure and Sustainable Energy Futures (WISE-Futures), the Nelson Mandela African Institution of Science and Technology, P.O.BOX 9124, Nelson Mandela, Arusha, Tanzania

**Corresponding author’s email:* [*yusufu.jande@nm-aist.ac.tz*](mailto:yusufu.jande@nm-aist.ac.tz)

SUPPLIMENTARY MATERIALS

Figure S1shows procedures for preparation of calcined banana assh (CBA) catalyst. This was done by slicing the banana peel followed by sun drying then oven drying and finally calcination at 650 0C to obtain the required catalyst.


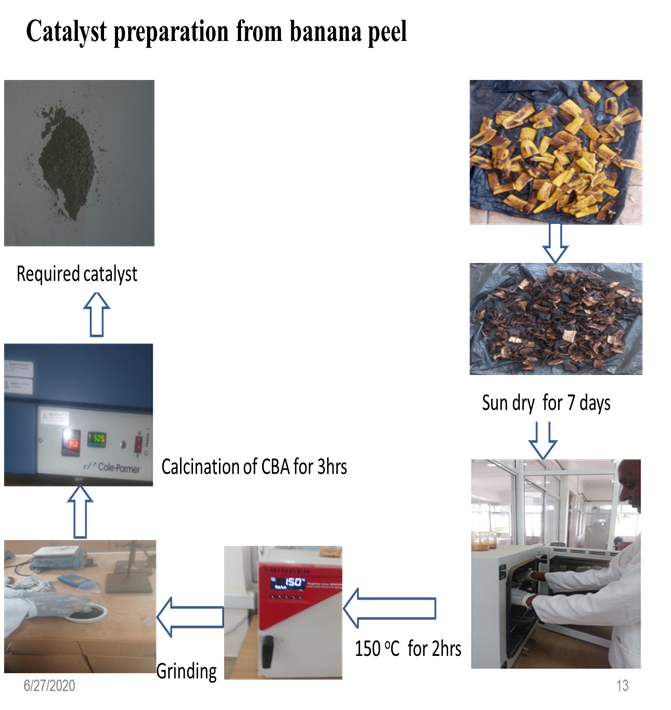


Figure S1 preparation of CBA catalyst

Figure S2 shows procedures for extraction of oil from neem seed. Neem seed oil was extracted using a hydraulic pressing machine. Neem seeds were fed to the machine and then pressed to produce oil.


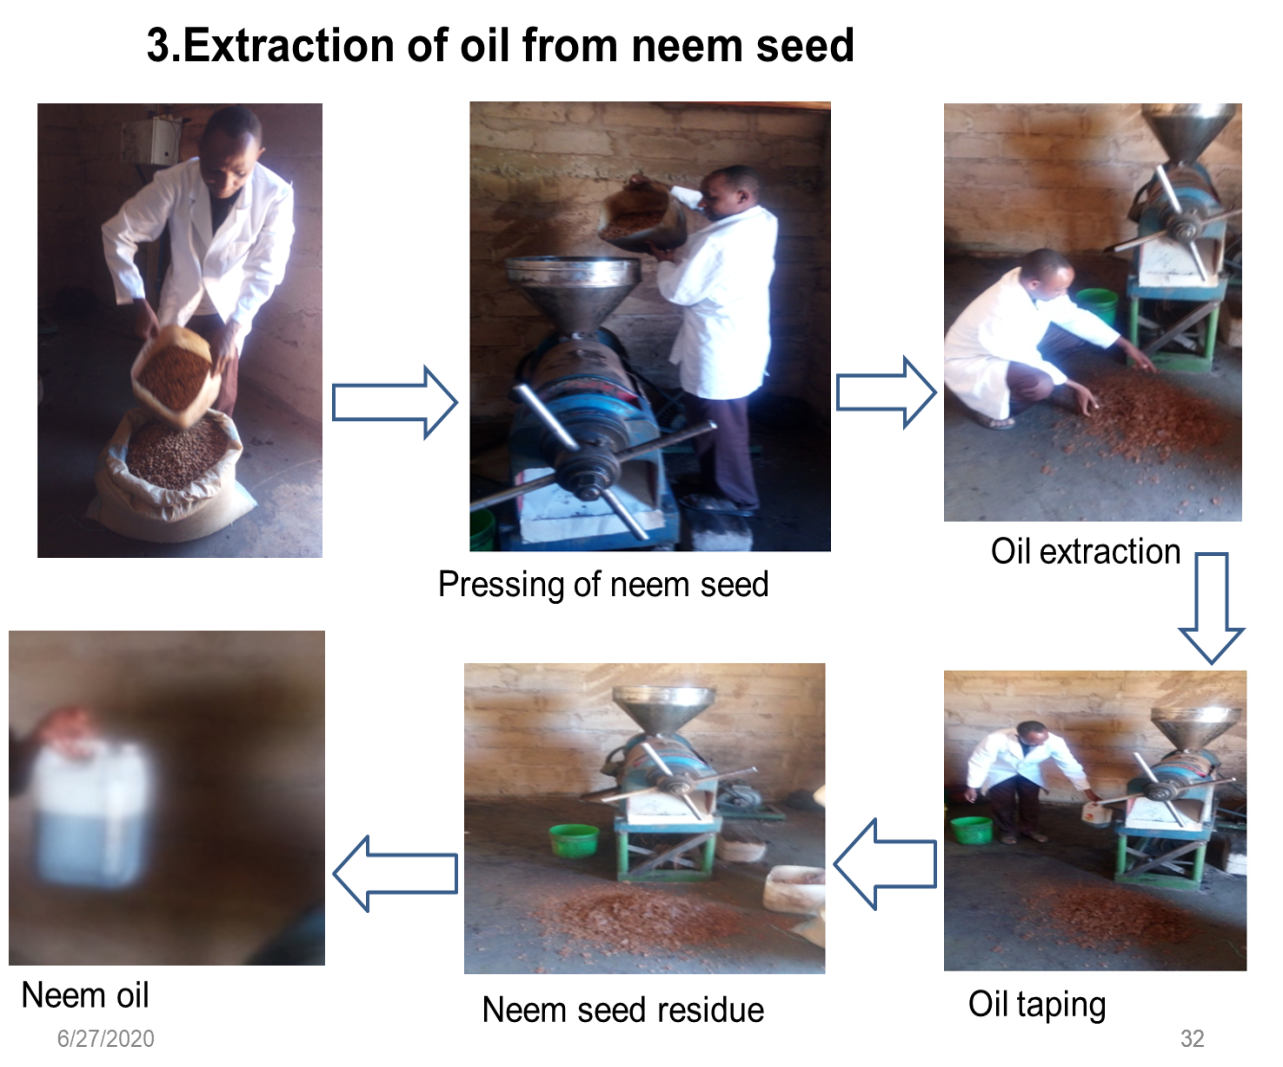


Figure S2 shows procedures for extraction of oil from neem seed.

Figure S3 shows biodiesel production steps through transesterification process using CBA loaded with metal oxide (Li-CaO/Fe2 (SO4)3 as a catalyst.


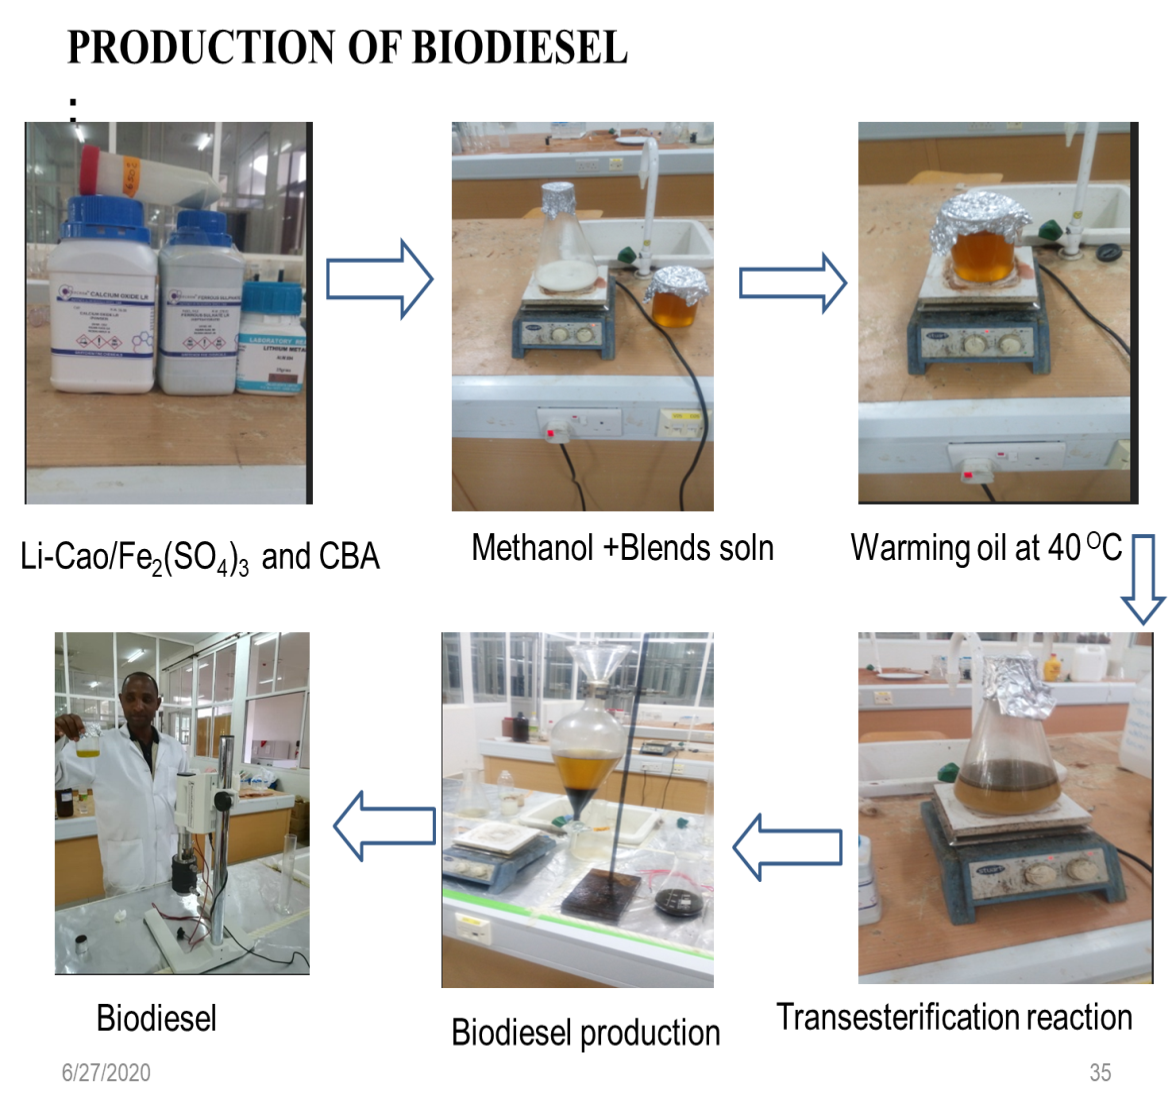


Figure S3 shows biodiesel production through transesterification process.
